# Supplementary material
Source: PubMed Central journal article supplement (PMC3137571)
Supplement: supp_ASN.2010070693_Supplemental_file.pdf [file supp_ASN.2010070693_Supplemental_file.pdf]

## **Supplementary Material**

**accompanying the manuscript**

### **IL-25 induces alternatively-activated macrophages and reduces renal injury in Adriamycin nephropathy**

Qi Cao, Changqi Wang, Dong Zheng, Ya Wang, Vincent W.S. Lee, Yuan Min Wang, Guoping Zheng, Thian Kui Tan, Di Yu, Stephen I. Alexander, David C.H. Harris and Yiping Wang

#### **This PDF file includes:**

Figs. S1 to S4

Table S1

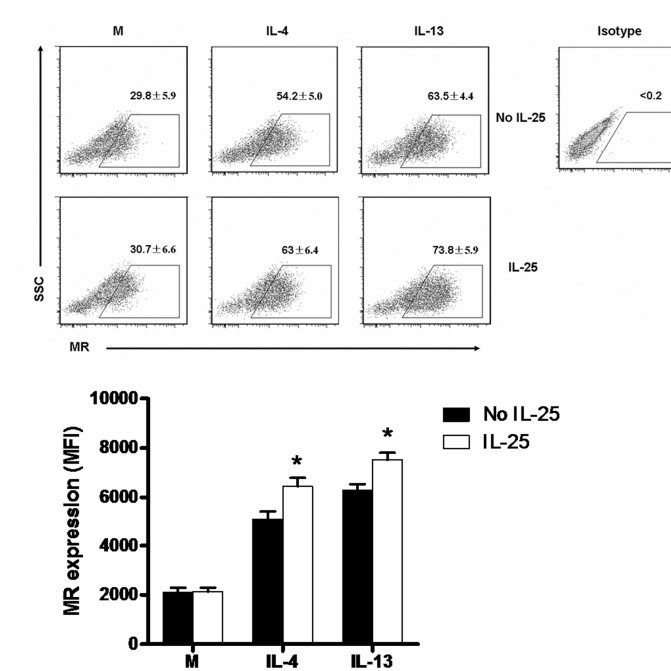

**Figure S1. IL-25 increased MR expression in macrophages cultured with IL-4 or IL-13.**

The expression of mannose receptor (MR) was assessed by flow cytometry (percentage and mean fluorescence intensity, MFI) in bone marrow macrophages preincubated for 1 hour with medium (M) or IL-25 (100 ng/ml) combined or not with IL-4 or IL-13 for a further 20 hours *in vitro*. The values represent the mean  $\pm$  SEM of evaluations from each group (n=4 per group). \*P<0.05. vs. No IL-25.

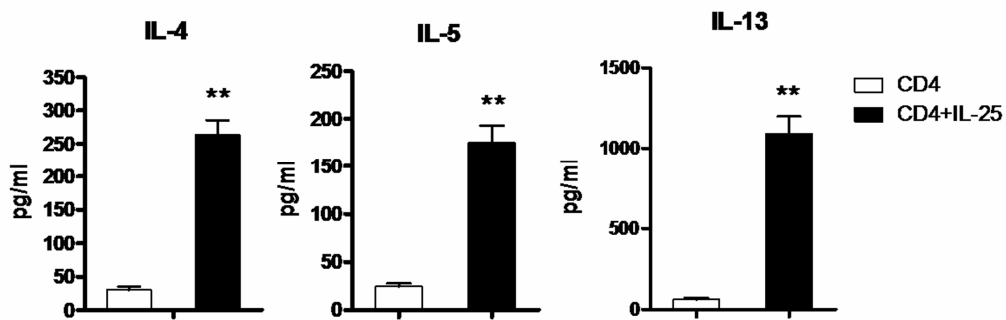

**Figure S2. IL-25 promoted Th2 cell differentiation *in vitro*.**

Naïve CD4<sup>+</sup> T cells were stimulated with anti-CD3, anti-CD28, and IL-2 in the presence of recombinant IL-25. After 3 d, cells were restimulated with plate-bound anti-CD3 for 24 h, and cytokine production was measured by ELISA. The values represent the mean  $\pm$  SEM of evaluations from each group (n=4 per group). \*\*P<0.01. vs. CD4.

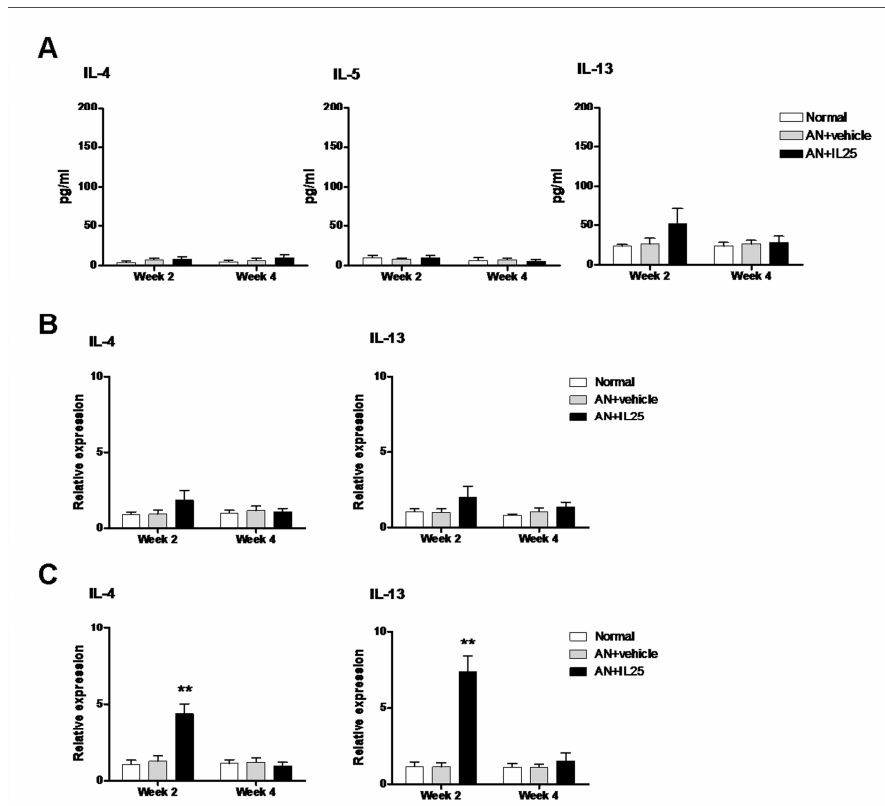

**Figure S3. The effects of IL-25 on Th2 immune responses in AN SCID mice.** In SCID mice, IL-4, IL-5 and IL-13 levels in serum were assessed by ELISA (A) and the mRNA expression of IL-4 and IL-13 in kidney (B) and renal draining lymph nodes (RDLN) (C) was quantified by real-time PCR in normal, AN+vehicle and AN+IL-25 groups at week 2 and 4. The values represent the mean  $\pm$  SEM from each group (n=8 per group). The values represent the mean  $\pm$  SEM of evaluations from each group (n=4 per group). \*\*P<0.01. vs. AN+vehicle.

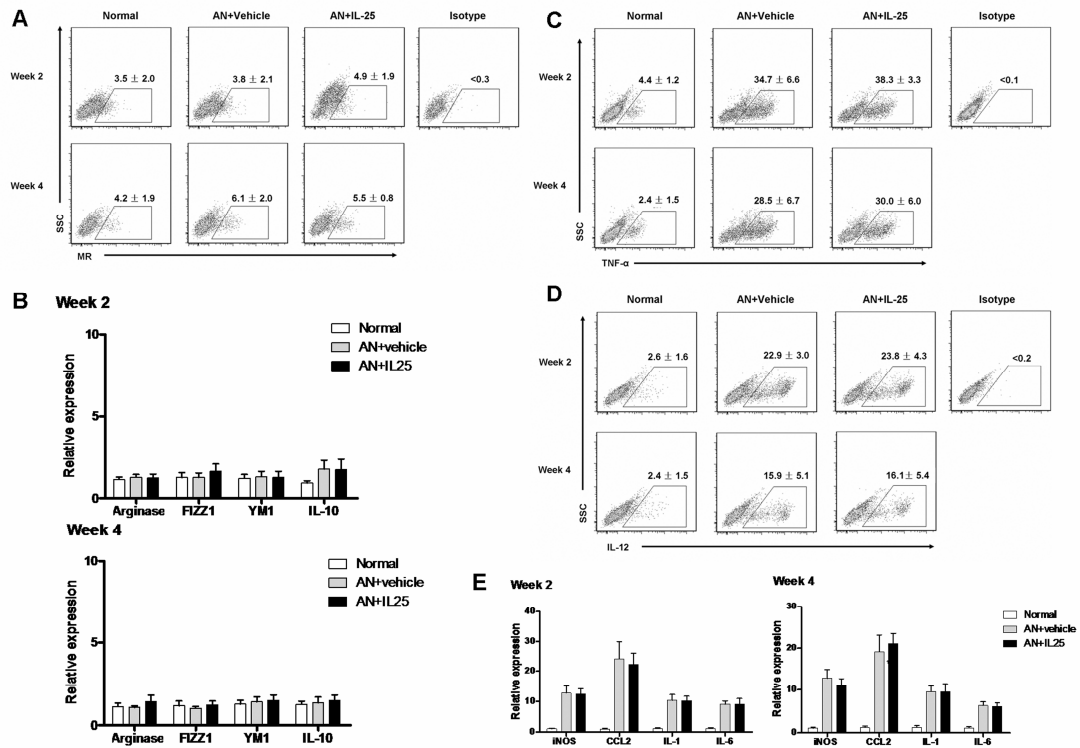

**Figure S4. IL-25 failed to induce M2 macrophages and suppress endogenous renal macrophages in AN SCID mice.** In SCID mice, the expression of MR, TNF $\alpha$  and IL-12 of endogenous renal macrophages was measured by flow cytometry (A, C and D) and the mRNA expression of arginase, FIZZ1, YM1, IL-10, iNOS, CCL2, IL-1 $\beta$  and IL-6 was quantified by real-time PCR (B and E). The values represent the mean  $\pm$  SEM of evaluations from each group (n=8 per group).

**Table S1.** Real-time PCR primers

| <b>Gene</b>          | <b>primer sequence(5'-3')</b> | <b>Product</b> |
|----------------------|-------------------------------|----------------|
| IL-4 (F)             | tcaacccccagctagttgtc          | 184            |
| IL-4 (R)             | tctgtggtgttcttcgttgc          |                |
| IL-13 (F)            | cagcatggtatggagtgtgg          | 153            |
| IL-13 (R)            | aggctggagaccgtagtgg           |                |
| iNOS (F)             | caccttgagttcaccagt            | 170            |
| iNOS (R)             | accactgtacttgggatgc           |                |
| TNF- $\alpha$ (F)    | gctgagctcaaaccctggta          | 118            |
| TNF- $\alpha$ (R)    | cggactccgcaaagtctaag          |                |
| MCP-1 (F)            | agcaccagccaactctcact          | 136            |
| MCP-1 (R)            | cgtaactgcatctggctga           |                |
| IL-1 $\beta$ (F)     | tgccacctttgacagtgatg          | 136            |
| IL-1 $\beta$ (R)     | atgtgctgctgcgagatttg          |                |
| IL-6 (F)             | cacaagtccggagaggagac          | 136            |
| IL-6 (R)             | ttgccattgcacaactcttt          |                |
| IL-12 (F)            | gacatcacacgggaccaaac          | 160            |
| IL-12 (R)            | taccaaggcacagggtcatc          |                |
| Mannose receptor (F) | caaggaaggttggcatttgt          | 111            |
| Mannose receptor (R) | ccttcagtcctttgcaagc           |                |
| Arginase (F)         | agtctggcagttggaagcat          | 104            |
| Arginase (R)         | ctggttgcaggggagtgtt           |                |
| FIZZ1 (F)            | tgctgggatgactgctactg          | 156            |

---

|           |                         |     |
|-----------|-------------------------|-----|
| FIZZ1 (R) | ctgggtctccacctctca      |     |
| YM1 (F)   | cagctgggatcttctacca     | 141 |
| YM1 (R)   | attctgcattccagcaaagg    |     |
| IL10 (F)  | ccagtacagccgggaagaca    | 121 |
| IL10 (R)  | cagctggtcctttggttgaaaga |     |
| CCL17 (F) | tgcttctggggactttctg     | 147 |
| CCL17 (R) | catcctggaactccact       |     |

---

F=forward, R=reverse.
